# Supplementary material for: Environmentally dependent dust chemistry of a super Asian dust storm inMarch 2010: observation and simulation
Source: Copernicus journal article supplement (doi:10.5194/acp-2017-438), 2017-05-15
Supplement: Supplementary file 1 [file acp-2017-438-supplement.pdf]

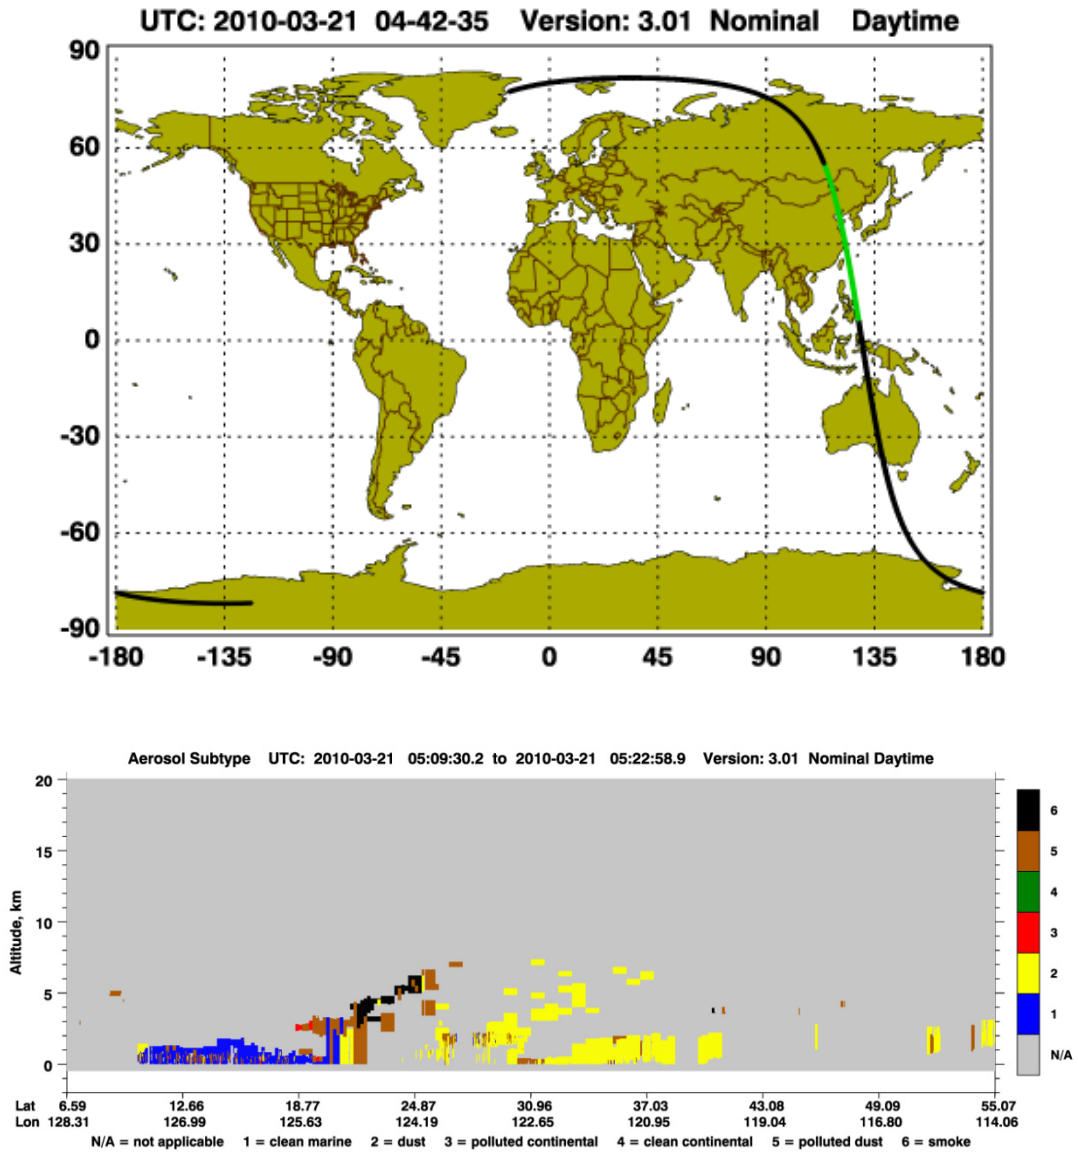

Fig. S1 CALIOP Lidar transects and the orbit tracks across the sampling region and adjacent areas on March 21, 2010.

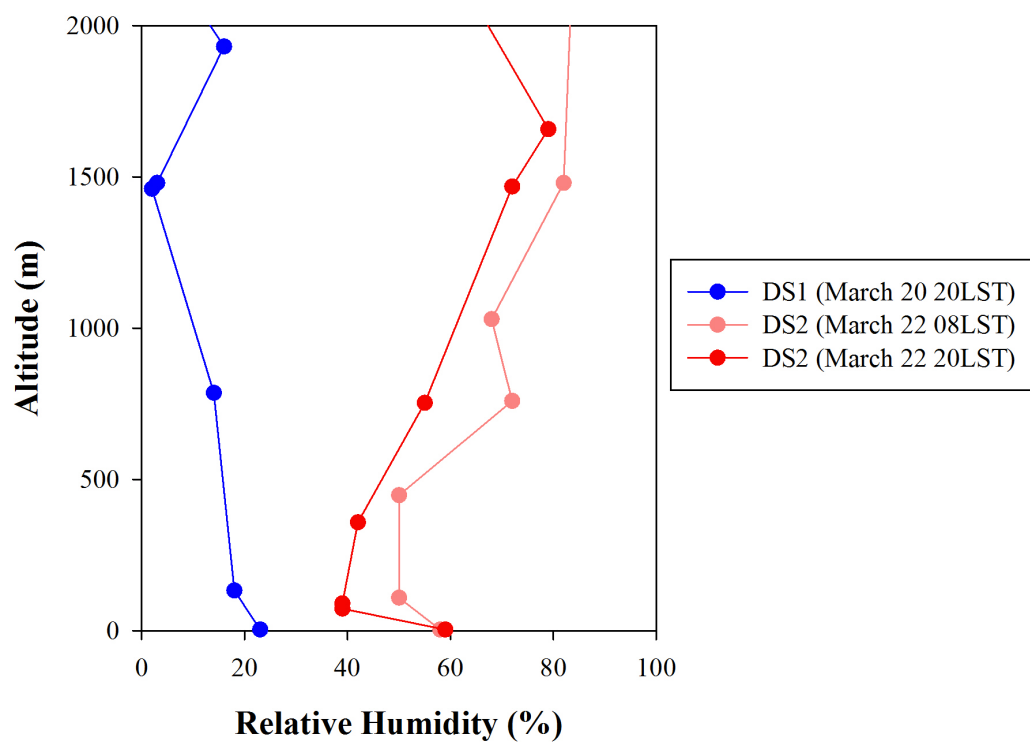

Fig. S2 Vertical profiles of relative humidity (RH) from sounding measurements at the Baoshan meteorology station in Shanghai
